# Supplementary material
Source: PubMed Central journal article supplement (PMC2867566)
Supplement: 00506.2009_1.pdf [file 00506.2009_1.pdf]

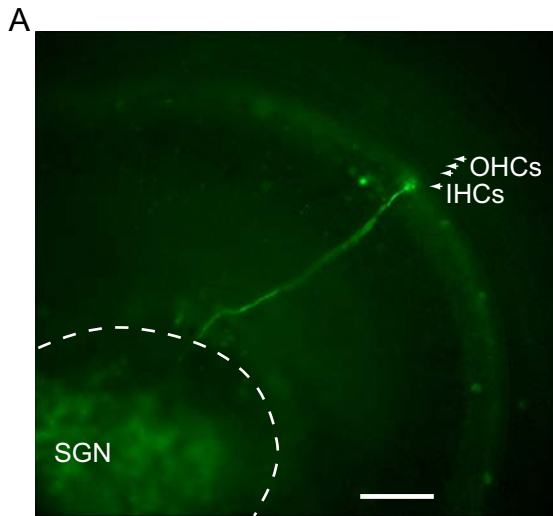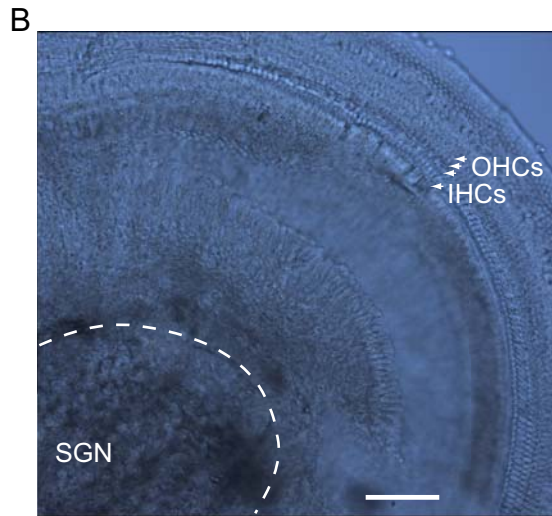

Supplemental figure 1

HCN1

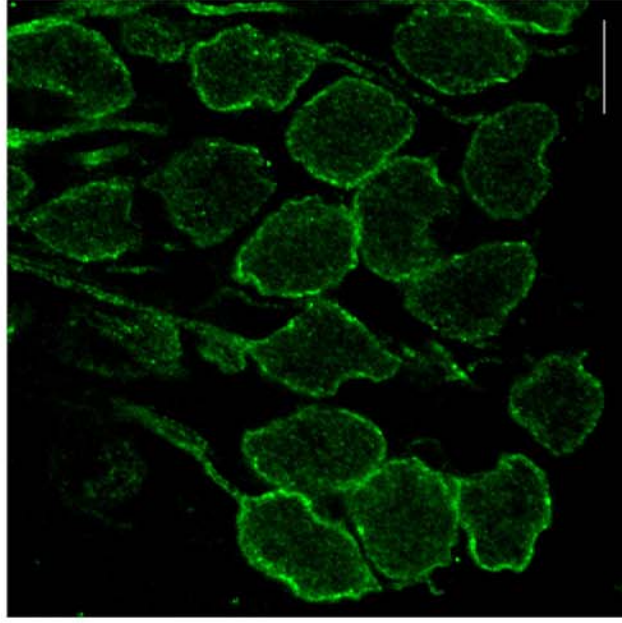

HCN4

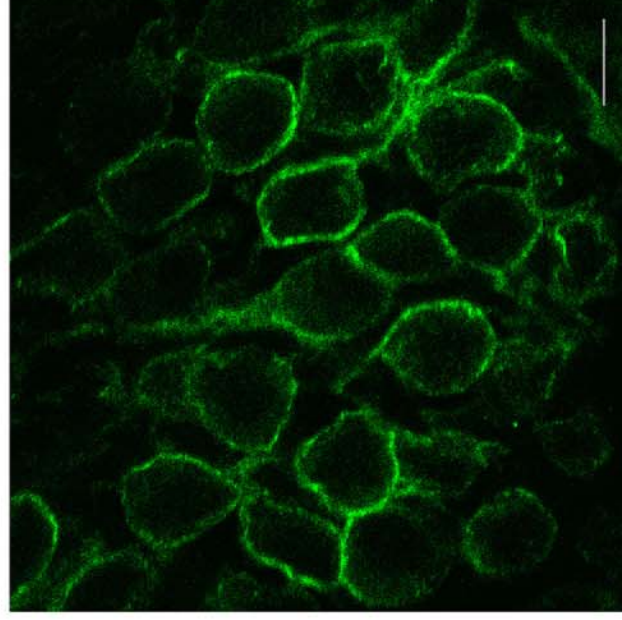

HCN2

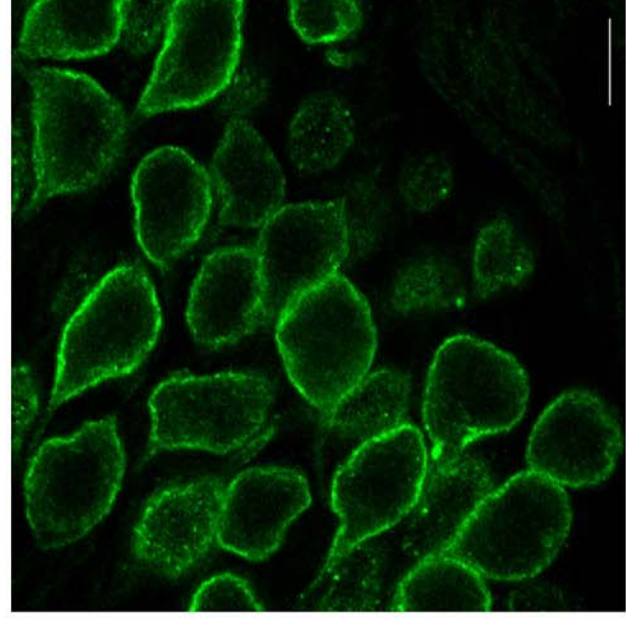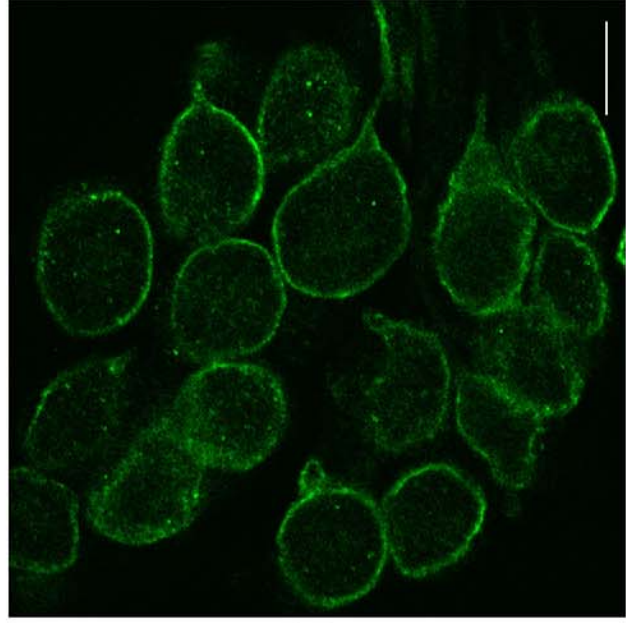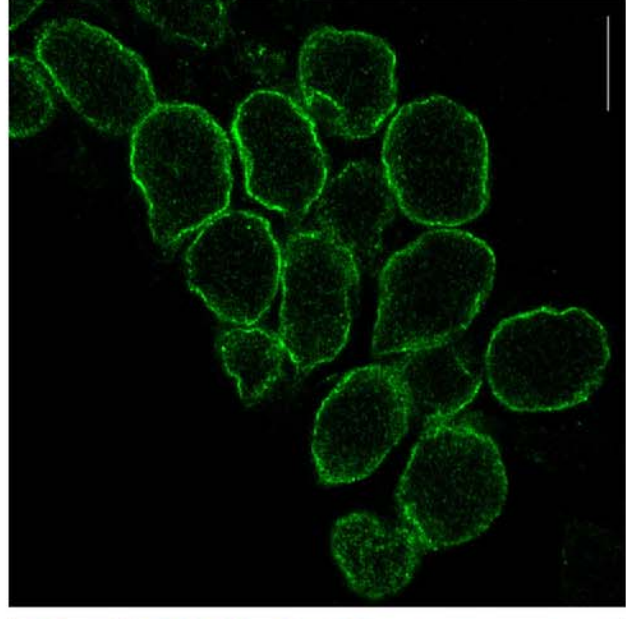

P9/P10

P20/P21

**Supplemental Figure 1.** Fluorescent dye-filled auditory nerve fiber. Alexa Fluor 488 hydrazide (10  $\mu$ M) was included in the pipette solution during a whole-cell patch-clamp recording. The recording pipette was located at the terminal of the afferent fiber, close to its contact with the IHC. **A**, The fiber (in green) could be traced from the IHC region for a distance of  $\sim$  400  $\mu$ m, until close to its entrance point into the spiral ganglion (SGN). Rows of inner (IHCs) and outer hair cells (OHCs) near the recording site are marked by arrows. **B**, the same tissue as in (**A**) viewed in transmitted light. The dotted line marks the attachment of Reissners membrane for orientation. Scale bar: 100  $\mu$ m.

**Supplemental Figure 2.** HCN subunit expression in spiral ganglion neurons. Single confocal laser-scanning micrographs of whole-mount rat cochlea preparations. At P9-10, HCN1 and HCN4, but not HCN2 immunolabeling was detected in spiral ganglion neurons. At P20-21, spiral ganglion neurons were positive for HCN1, HCN2 and HCN4 labeling. At both ages, a strong labeling was found in the plasma membrane of the somata and of the most proximal part of the neurites. Scale bars: 10  $\mu$ m.
